# Supplementary material
Source: PubMed Central journal article supplement (PMC4207997)
Supplement: supp_M114.591073_jbc.M114.591073-1.pdf [file supp_M114.591073_jbc.M114.591073-1.pdf]

## SUPPORTING INFORMATION

Human 2-Oxoglutarate Dehydrogenase Complex E1 Component Forms a Thiamin-derived Radical by Aerobic Oxidation of the Enamine Intermediate.

<sup>1</sup>N. S. NEMERIA<sup>#</sup>, <sup>2</sup>A. AMBRUS<sup>#</sup>, <sup>1</sup>H. PATEL<sup>#</sup>, <sup>3</sup>G. GERFEN, <sup>2</sup>V. ADAM-VIZI, <sup>2</sup>L. TRETTER, <sup>1</sup>J. ZHOU, <sup>1</sup>J. WANG and <sup>1</sup>F. JORDAN\*

<sup>1</sup>*Dept. of Chemistry, Rutgers University, Newark, NJ 07102, USA*, <sup>2</sup>*Department of Medical Biochemistry, MTA-SE Laboratory for Neurobiochemistry, Semmelweis University, Budapest, 1094, Hungary*, <sup>3</sup>*Department of Physiology and Biophysics, Albert Einstein College of Medicine, Bronx, NY 10461, USA*

**SI Table S1.** Peptic peptides originated from E1o-h <sup>a</sup>

| No. | Position | Peptides<br>Sequence                 | Monoisotopic Mass<br>[M+H] <sup>+</sup> (Da) |             | Error<br>(ppm) |
|-----|----------|--------------------------------------|----------------------------------------------|-------------|----------------|
|     |          |                                      | Experimental                                 | Theoretical |                |
| 1   | 2-8      | SAPVAAE                              | 644.3248                                     | 644.3250    | -0.2           |
| 2   | 9-17     | PFLSGTSSN                            | 909.4309                                     | 909.4312    | -0.3           |
| 3   | 18-22    | YVEEM                                | 670.2756                                     | 670.2753    | 0.5            |
| 4   | 22-32    | MYCAWLENPKS                          | 1341.5956                                    | 1341.5966   | -0.8           |
| 5   | 34-47    | HKSWDIFFRNTNAG                       | 1692.8260                                    | 1692.8241   | 1.1            |
| 6   | 41-65    | FRNTNAGAPPGTAYQSPLPLSRGSL            | 2572.3259                                    | 2572.3267   | -0.3           |
| 7   | 66-74    | AAVAHAQSL                            | 867.4678                                     | 867.4683    | -0.5           |
| 8   | 75-84    | VEAQPNVDKL                           | 1112.5938                                    | 1112.5946   | -0.7           |
| 9   | 85-89    | VEDHL                                | 612.2986                                     | 612.2988    | -0.2           |
| 10  | 90-94    | AVQSL                                | 517.2980                                     | 517.2980    | 0.0            |
| 11  | 95-114   | IRAYQIRGHHVAQLDPLGIL                 | 2270.2893                                    | 2270.2880   | 0.6            |
| 12  | 115-135  | DADLDSSVPADIISSTDKLGF                | 2166.0460                                    | 2166.0448   | 0.5            |
| 13  | 136-143  | YGLDESDL                             | 911.3996                                     | 911.3993    | 0.3            |
| 14  | 144-151  | DKVFHLPT                             | 956.5211                                     | 956.5200    | 1.1            |
| 15  | 153-161  | TFIGGQESA                            | 909.4305                                     | 909.4312    | -0.8           |
| 16  | 163-187  | PLREIIRLEMAYCQHIGVEFMFIN             | 3078.5865                                    | 3078.5838   | 0.9            |
| 17  | 186-207  | INDLEQCQWIRQKFETPGIMQF               | 2724.3279                                    | 2724.3273   | 0.2            |
| 18  | 207-216  | FTNEEKRTLL                           | 1250.6742                                    | 1250.6739   | 0.2            |
| 19  | 220-228  | VRSTRFEEF                            | 1170.5917                                    | 1170.5902   | 1.3            |
| 20  | 229-245  | LQRKWSSEKRFLEGCE                     | 2053.0306                                    | 2053.0284   | 1.1            |
| 21  | 246-264  | VLIPALKTIIDKSENGVD                   | 2012.1267                                    | 2012.1274   | -0.3           |
| 22  | 265-291  | YVIMGMPHRGRLNVLANVIRKELEQIF          | 3196.7582                                    | 3196.7598   | -0.5           |
| 23  | 292-326  | CQFDSKLEAADEGSGDVKYHLGMYHRRINRVTDNRN | 4080.9581                                    | 4080.9515   | 1.6            |
| 24  | 327-331  | ITLSL                                | 546.3501                                     | 546.3497    | 0.7            |
| 25  | 332-338  | VANPSHL                              | 737.3941                                     | 737.3941    | 0.0            |
| 26  | 339-354  | EAADPVVMGKTKAEQF                     | 1720.8570                                    | 1720.8574   | -0.3           |
| 27  | 355-375  | YCGDTEGKKVMSILLHGDAAF                | 2255.0829                                    | 2255.0835   | -0.3           |
| 28  | 376-385  | AGQGIVYETF                           | 1084.5312                                    | 1084.5310   | 0.3            |
| 29  | 386-406  | HLSDLPSYTTHTGTVHVVVNNQ               | 2318.1550                                    | 2318.1524   | 1.1            |
| 30  | 407-434  | IGFTTDPMARSSPYPTDVARVVNAPIF          | 3078.5865                                    | 3078.5830   | 1.2            |
| 31  | 435-445  | HVNSDDPEAVM                          | 1213.5153                                    | 1213.5154   | -0.1           |
| 32  | 446-453  | YVCKVAAE                             | 882.4385                                     | 882.4390    | -0.5           |
| 33  | 454-466  | WRSTFHKDVVVDL                        | 1601.8450                                    | 1601.8435   | 1.0            |
| 34  | 467-481  | VCYRRNGHNEMDEPM                      | 1850.7719                                    | 1850.7731   | -0.7           |
| 35  | 482-487  | FTQPLM                               | 736.3700                                     | 736.3698    | 0.2            |

|    |         |                                              |           |           |      |
|----|---------|----------------------------------------------|-----------|-----------|------|
| 36 | 488-504 | YKQIRKQKPVLLQKYAEL                           | 2133.2548 | 2133.2543 | 0.2  |
| 37 | 505-528 | LVSQGVVNQPEYEEEISKYDKICE                     | 2799.3407 | 2799.3393 | 0.5  |
| 38 | 529-565 | EAFARSKDEKILHIKHWLDSPWPGFFTLDGQPRMSC         | 4330.1352 | 4330.1325 | 0.6  |
| 39 | 566-573 | PSTGLTED                                     | 819.3732  | 819.3731  | 0.2  |
| 40 | 574-589 | ILTHIGNVASSVPVEN                             | 1649.8873 | 1649.8857 | 1.0  |
| 41 | 590-596 | FTIHGGL                                      | 744.4050  | 744.4039  | 1.4  |
| 42 | 597-616 | SRILKTRGEMVKNRTVDWAL                         | 2373.3207 | 2373.3183 | 1.0  |
| 43 | 620-625 | MAFGSL                                       | 625.3010  | 625.3014  | -0.7 |
| 44 | 626-638 | LKEGIHIRLSGQD                                | 1465.8143 | 1465.8122 | 1.5  |
| 45 | 639-678 | VERGTFSHRHHVLHDQNVDKRTCIPMNLWPNQAPYTVCN      | 4750.2876 | 4750.2837 | 0.8  |
| 46 | 682-687 | SEYGVV                                       | 667.3298  | 667.3297  | 0.1  |
| 47 | 688-693 | GFELGF                                       | 669.3250  | 669.3243  | 1.1  |
| 48 | 694-701 | AMASPNAL                                     | 774.3812  | 774.3815  | -0.3 |
| 49 | 702-708 | VLWEAQF                                      | 892.4561  | 892.4563  | -0.3 |
| 50 | 715-734 | AQCIIQFICPGQAKWVRQN                          | 2318.1550 | 2318.1533 | 0.8  |
| 51 | 736-759 | IVLLLPHGMEGMGPEHSSARPERF                     | 2660.3449 | 2660.3436 | 0.5  |
| 52 | 760-770 | LQMCNDDPDVL                                  | 1262.5412 | 1262.5392 | 1.6  |
| 53 | 771-778 | PDLKEANF                                     | 933.4684  | 933.4676  | 0.8  |
| 54 | 779-783 | DINQL                                        | 602.3142  | 602.3144  | -0.3 |
| 55 | 784-788 | YDCNW                                        | 700.2408  | 700.2395  | 1.8  |
| 56 | 789-833 | VVNCSTPGNFFHVLRRQILLPFRKPLIIFTPKSLLRHPEARSSF | 5230.9478 | 5230.9455 | 0.4  |
| 57 | 834-842 | DEMLPGTHF                                    | 1046.4593 | 1046.4612 | -1.7 |
| 58 | 843-864 | QRVIPEDGPAQNPENVKRLLF                        | 2491.3439 | 2491.3416 | 0.9  |
| 59 | 865-887 | CTGKVYYDLTRERKARDMVGQVA                      | 2659.3447 | 2659.3443 | 0.1  |
| 60 | 888-902 | ITRIQLSPFPDLL                                | 1788.9894 | 1788.9894 | 0.0  |
| 61 | 903-914 | LKEVQKYPNAEL                                 | 1431.7835 | 1431.7842 | -0.5 |
| 62 | 915-928 | AWCQEEHKNQGYD                                | 1770.7188 | 1770.7177 | 0.7  |
| 63 | 929-945 | YVKPRLRTTISRAKPVW                            | 2071.2293 | 2071.2287 | 0.3  |
| 64 | 946-967 | YAGRDPAAPATGNKKTHLTEL                        | 2282.1902 | 2282.1888 | 0.6  |
| 65 | 968-975 | QRLDPTAF                                     | 963.5263  | 963.5258  | 0.6  |
| 66 | 976-992 | DLDFKFNFSLEHHHHHH                            | 2149.0136 | 2149.0111 | 1.2  |

Table S2. Peptic peptides derived from E2o-h.

| Position | Sequence                                      | Monoisotopic Mass<br>[M+H] <sup>+</sup> (Da) |             | Error<br>(ppm) |
|----------|-----------------------------------------------|----------------------------------------------|-------------|----------------|
|          |                                               | Experimental                                 | Theoretical |                |
| 6-33     | VKTPAFAESVTEGDVVRWEKAVGDTVAE                  | 2891.4419                                    | 2891.4      | -0.1           |
| 21-48    | RWEKAVGDTVAEDEVVCEIETDKTSVQV                  | 3135.5089                                    | 3135.5      | -2.0           |
| 51-59    | PANGVIEAL                                     | 883.4881                                     | 883.5       | -0.3           |
| 59-75    | LLVPDGGKVEGGTPLFT                             | 1699.9258                                    | 1699.9      | -0.4           |
| 76-94    | LRKTGAAPAKAKPAEAPAA                           | 1819.0558                                    | 1819.1      | 0.5            |
| 95-105   | AAPKAEPTAAA                                   | 997.5299                                     | 997.5       | -1.4           |
| 106-134  | VPPPAAPIPTQMPPVSPSQPPSGKPVSA                  | 2828.5017                                    | 2828.5      | 0.1            |
| 135-180  | VKPTVAPPLAEAGAGKGLRSEHREKMNRMRQRIARLKEAQNTCAM | 5128.7045                                    | 5128.7      | -0.9           |
| 181-186  | LTTFNE                                        | 724.3506                                     | 724.4       | -0.8           |
| 187-216  | IDMSNIQEMRARHKEAFLKKNLKLGFMSA                 | 3543.8502                                    | 3543.8      | 0.1            |
| 217-223  | FVKASAF                                       | 769.4239                                     | 769.4       | -0.5           |
| 224-233  | ALQEQPVVNA                                    | 1068.5677                                    | 1068.6      | -0.6           |
| 234-246  | VIDDTTKEVVYRD                                 | 1552.7853                                    | 1552.8      | 0.0            |
| 247-252  | YIDISV                                        | 709.3771                                     | 709.4       | 0.6            |
| 253-272  | AVATPRGLVVPVIRNVEAMN                          | 2106.1837                                    | 2106.2      | -0.7           |
| 273-292  | FADIERTITELGEKARKNEL                          | 2333.2448                                    | 2333.2      | -0.5           |
| 293-301  | AIEDMDGGT                                     | 908.3661                                     | 908.4       | -0.6           |
| 302-313  | FTISNGGVFGSL                                  | 1198.6095                                    | 1198.6      | -0.7           |
| 314-350  | FGTPIINPPQSAILGMHGIFDRPVAIGGKVEVRPMMY         | 4009.0976                                    | 4009.1      | -0.9           |
| 350-364  | YVALTYDHRLIDGRE                               | 1820.9286                                    | 1820.9      | -0.2           |
| 365-368  | AVTF                                          | 437.2396                                     | 437.2       | 0.3            |
| 369-383  | LRKIKAAVEDPRVLL                               | 1721.0796                                    | 1721.1      | 0.0            |

<sup>a</sup> For peptic digestion, samples of E1o-h (25  $\mu$ L) and E2o-h (25  $\mu$ L) were prepared in 20 mM NH<sub>4</sub>NCO<sub>3</sub> (pH 7.0). Peptic digestion was as reported by us recently (SI ref S1 and ref S2)

### SI References

- S1. Chandrasekhar, K., Wang, J., Arjunan, p., Sax, M., Park, Y. H., Nemeria, N. S., Kumaran, S., Song, J., Jordan, F., and Furey, W. (2013) Insight to the interaction of the dihydrolipoamide acetyltransferase (E2) core with the peripheral components in the *Escherichia coli* pyruvate dehydrogenase complex via multifaceted approaches. *J. Biol. Chem.* **288**, 15402-15417
- S2. Wang, J., Nemeria, N. S., Chandrasekhar, K., Kumaran, S., Arjunan, P., Reynolds, SD., Calero, G., Brukh, R., Kakalis, L., Furey, W., and Jordan, F. (2014) Structure and function of the catalytic domain of the dihydrolipoyl acetyltransferase component in *Escherichia coli* pyruvate dehydrogenase complex. *J. Biol. Chem.* **289**, 15215-15230
